# Supplementary material for: Differential transcript usage in the Parkinson’s disease brain
Source: PubMed Central journal article supplement (PMC7660910; doi:10.1371/journal.pgen.1009182), 2020-11-02
Supplement: pgen.1009182.s007.pdf [file pgen.1009182.s007.pdf]

| <b>Transcript biotype</b>          | <b>P-value</b>        | <b>Bonferroni P-value</b> | <b>Odds ratio</b> | <b>Tool</b> |
|------------------------------------|-----------------------|---------------------------|-------------------|-------------|
| Protein coding                     | 1 x 10 <sup>-10</sup> | 4x10 <sup>-9</sup>        | 0.596             | DRIMSeq     |
| Retained intron                    | 3 x 10 <sup>-4</sup>  | 0.012                     | 1.552             | DRIMSeq     |
| Antisense                          | 7 x 10 <sup>-4</sup>  | 0.028                     | 2.233             | DRIMSeq     |
| Processed pseudogene               | 0.001                 | 0.04                      | 0.102             | DRIMSeq     |
| Nonsense mediated decay            | 0.006                 | 0.24                      | 1.859             | DRIMSeq     |
| Processed transcript               | 0.126                 | 1                         | 1.189             | DRIMSeq     |
| Unprocessed pseudogene             | 0.629                 | 1                         | Inf               | DRIMSeq     |
| LincRNA                            | 0.679                 | 1                         | 1.127             | DRIMSeq     |
| Unitary pseudogene                 | 1                     | 1                         | Inf               | DRIMSeq     |
| 3prime overlapping ncna            | 1                     | 1                         | Inf               | DRIMSeq     |
| Misc RNA                           | 1                     | 1                         | Inf               | DRIMSeq     |
| Non stop decay                     | 1                     | 1                         | Inf               | DRIMSeq     |
| Polymorphic pseudogene             | 1                     | 1                         | Inf               | DRIMSeq     |
| pseudogene                         | 1                     | 1                         | Inf               | DRIMSeq     |
| Sense overlapping                  | 1                     | 1                         | Inf               | DRIMSeq     |
| snoRNA                             | 1                     | 1                         | Inf               | DRIMSeq     |
| snRNA                              | 1                     | 1                         | Inf               | DRIMSeq     |
| Transcribed processed pseudogene   | 1                     | 1                         | Inf               | DRIMSeq     |
| Transcribed unprocessed pseudogene | 1                     | 1                         | 1.256             | DRIMSeq     |
| Sense intronic                     | 1                     | 1                         | Inf               | DRIMSeq     |
| Antisense                          | 0.002                 | 0.08                      | 3.363             | DEXSeq      |
| Protein coding                     | 0.019                 | 0.76                      | 0.769             | DEXSeq      |
| LincRNA                            | 0.028                 | 1                         | 2.532             | DEXSeq      |
| processed transcript               | 0.603                 | 1                         | 0.924             | DEXSeq      |
| Transcribed unprocessed pseudogene | 0.640                 | 1                         | Inf               | DEXSeq      |
| Nonsense mediated decay            | 0.701                 | 1                         | 1.169             | DEXSeq      |
| Retained intron                    | 0.939                 | 1                         | 1.027             | DEXSeq      |
| Polymorphic pseudogene             | 1                     | 1                         | Inf               | DEXSeq      |
| snoRNA                             | 1                     | 1                         | Inf               | DEXSeq      |
| Unitary pseudogene                 | 1                     | 1                         | Inf               | DEXSeq      |
| 3prime overlapping ncna            | 1                     | 1                         | Inf               | DEXSeq      |
| non_top decay                      | 1                     | 1                         | Inf               | DEXSeq      |
| Processed pseudogene               | 1                     | 1                         | Inf               | DEXSeq      |
| pseudogene                         | 1                     | 1                         | Inf               | DEXSeq      |
| Sense intronic                     | 1                     | 1                         | Inf               | DEXSeq      |
| Sense overlapping                  | 1                     | 1                         | Inf               | DEXSeq      |
| snRNA                              | 1                     | 1                         | Inf               | DEXSeq      |
| Transcribed processed pseudogene   | 1                     | 1                         | Inf               | DEXSeq      |
| Unprocessed pseudogene             | 1                     | 1                         | Inf               | DEXSeq      |
| Misc RNA                           | 1                     | 1                         | Inf               | DEXSeq      |
